# Supplementary material for: Single-step synthesis of carbon nanotubes/iron/iron oxide composite films through inert-ambient CVD using ferric acetylacetonate as a precursor
Source: Royal Society of Chemistry journal article supplement (doi:10.1039/c5ra07472j), 2015-01-01
Supplement: c5ra07472j1.pdf [file c5ra07472j1.pdf]

## Electronic Supplementary Information

### Single-step synthesis of Carbon Nanotubes/Iron/Iron oxide composite films through inert-ambient CVD using ferric acetylacetonate as precursor

Pallavi Arod<sup>a</sup> and S.A. Shivashankar<sup>a,b</sup>

<sup>a</sup>Materials Research Centre, <sup>b</sup>Centre for Nano Science and Engineering, Indian Institute of Science, Bangalore-560012, India

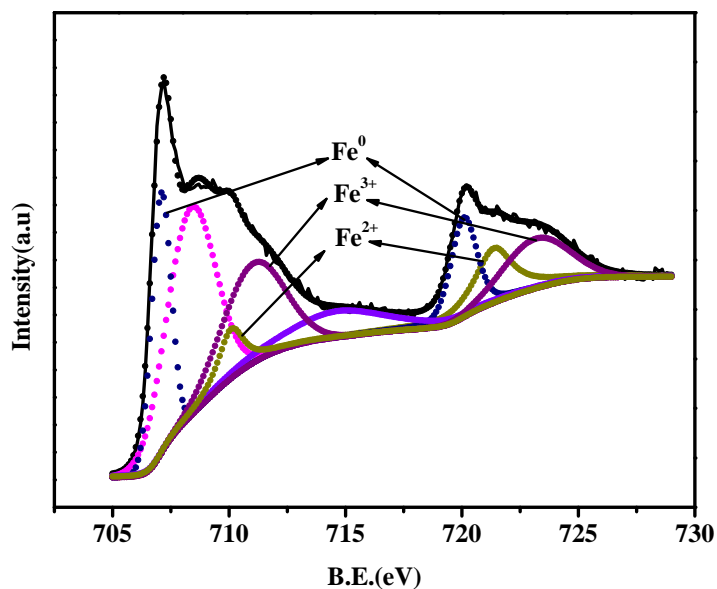

**Fig.1 Fe 2p spectra of the coating obtained on Si(100) at 700 °C and 30 torr, for the as-deposited film confirming the presence of elemental iron and magnetite**
